# Supplementary material for: Quantifying the polygenic contribution to variable expressivity in eleven rare genetic disorders
Source: PubMed Central journal article supplement (PMC6814771; doi:10.1038/s41467-019-12869-0), 2019-10-25
Supplement: 41467_2019_12869_MOESM2_ESM.pdf [file 41467_2019_12869_MOESM2_ESM.pdf]

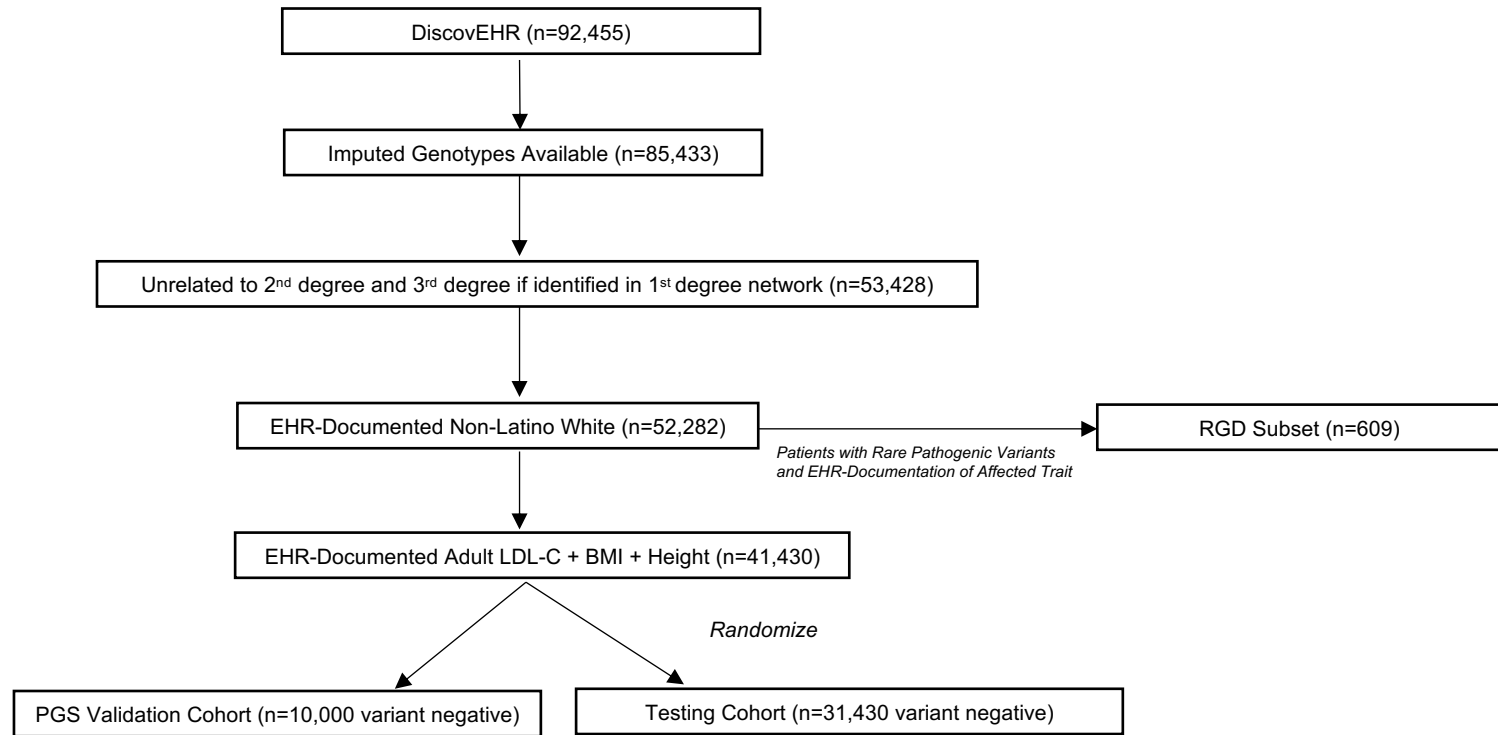

Supplementary Figure 1: Inclusion criteria for MyCode patient-participants in this study.

RGD: Rare Genetic Disorder  
 PGS: Polygenic Score

A.

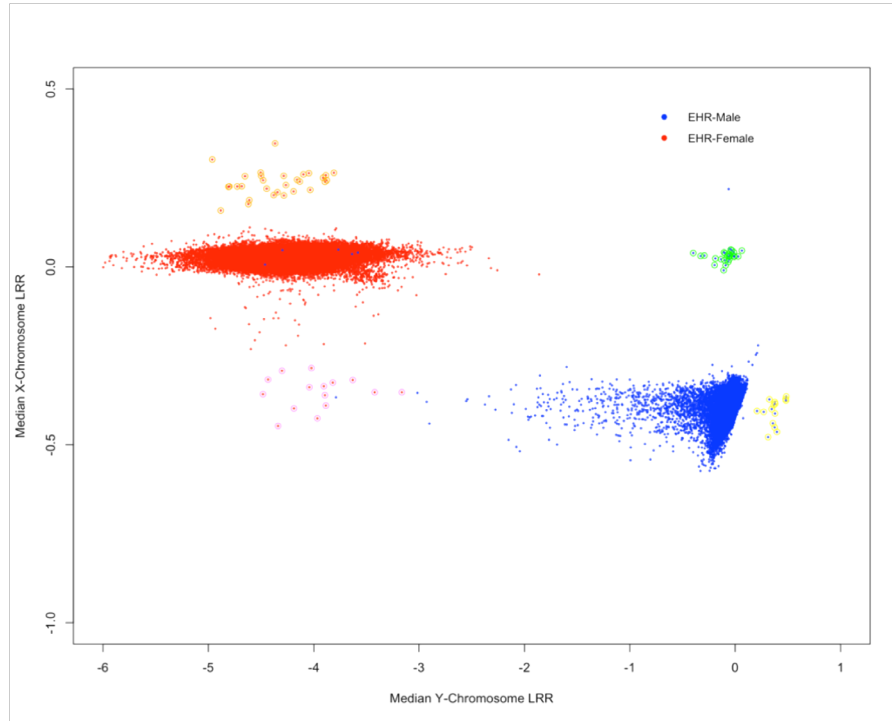

B.

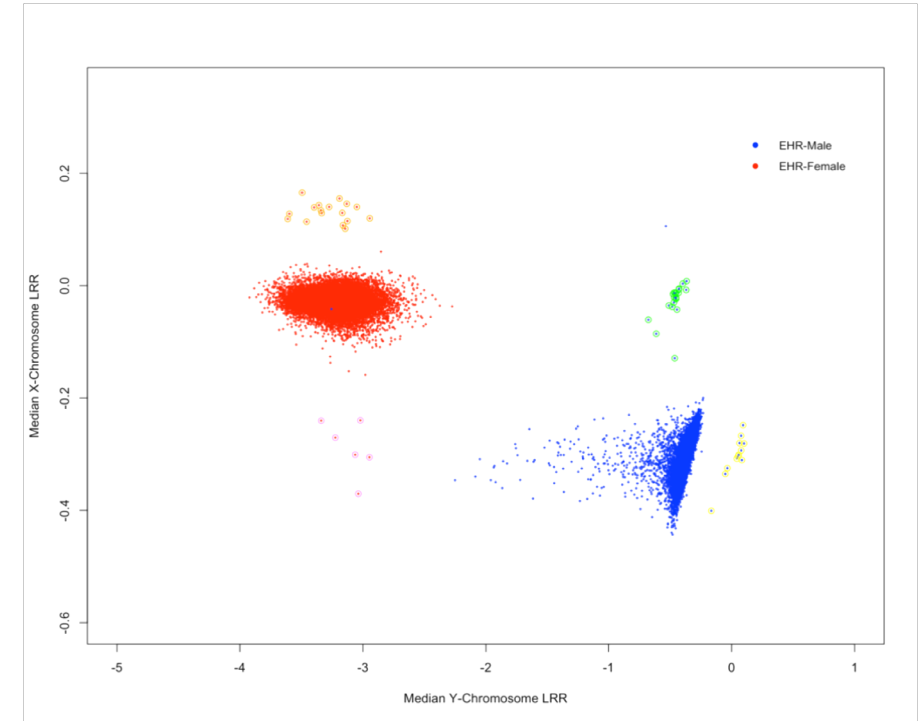

Supplementary Figure 2: Median X- and Y-chromosome Log R Ratios (LRR) of patient-participants genotyped on the Human Omni Express Exome (n=55,054) (A) and Global Screening Array (n=25,207) (B) passing QC. Points are colored based on EHR-documented gender for male (blue) and females (red). Sex chromosome aneuploidies are indicated with colored circles as followed: 47,XXX (orange), 47,XXY (green), 45,X + 45,X/45,XX (pink), and 47,XYY (yellow). The six EHR-documented males with median X- and Y-chromosome LRR values consistent with 46,XX were removed from further analysis.

A.

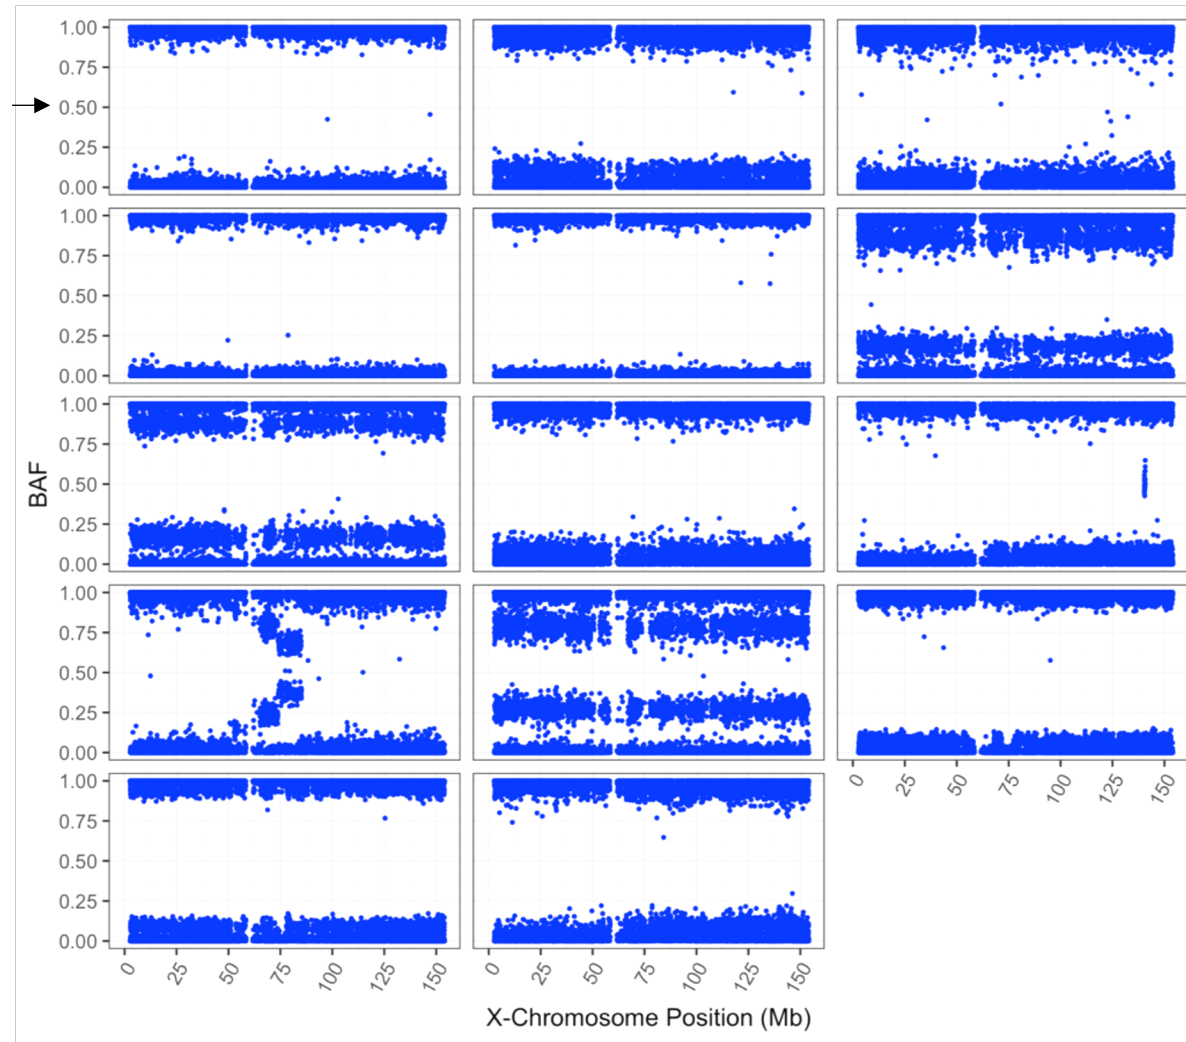

B.

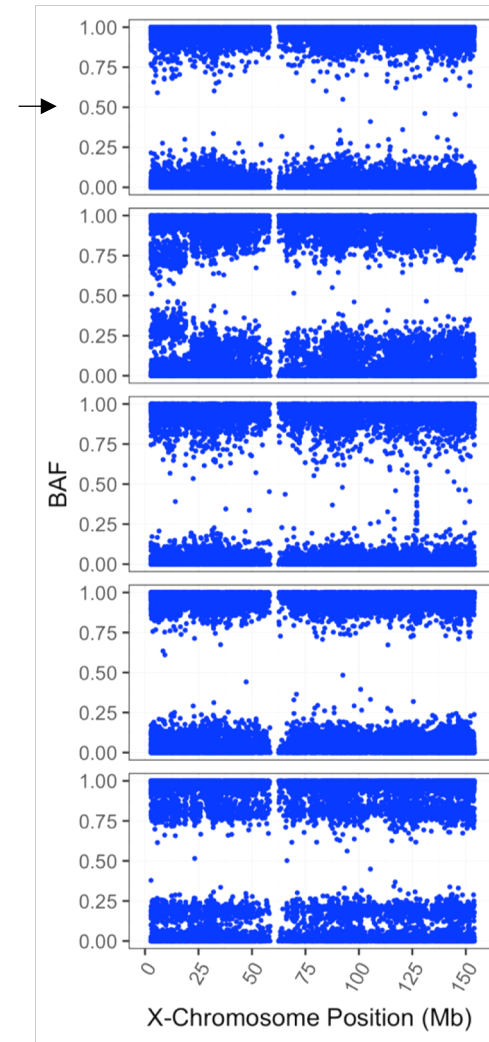

Supplementary Figure 3: X-chromosome B-allele frequency (BAF) profiles of the 45,X and 45,X/46,XX cases genotyped on the HOEE (A) and GSA (B) passing sample inclusion criteria and included in this study. Reference samples ( $mLRR_{min}$ ) for each platform used for 100% loss to calculate mosaicism are indicated with a black arrow.

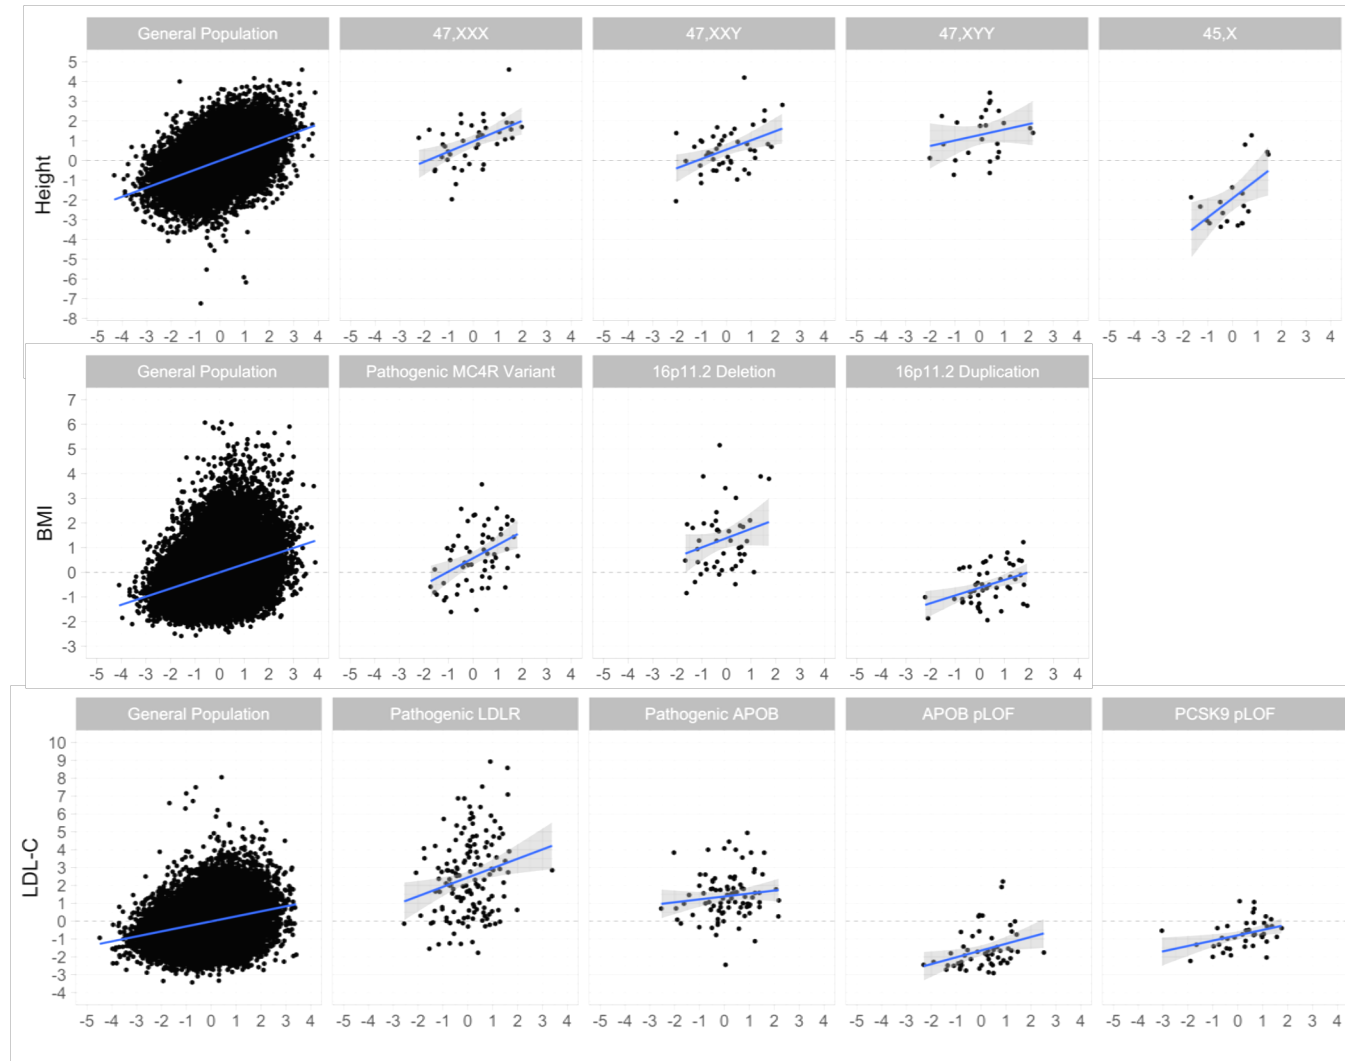

Supplementary Figure 4: Scatterplots of the standardized polygenic score (x-axis) against standardized quantitative phenotypes (y-axis). The regression line is indicated in blue and the gray shadow indicates the 95% confidence level interval. A horizontal dashed line is drawn in plots at 0 representing the population average.

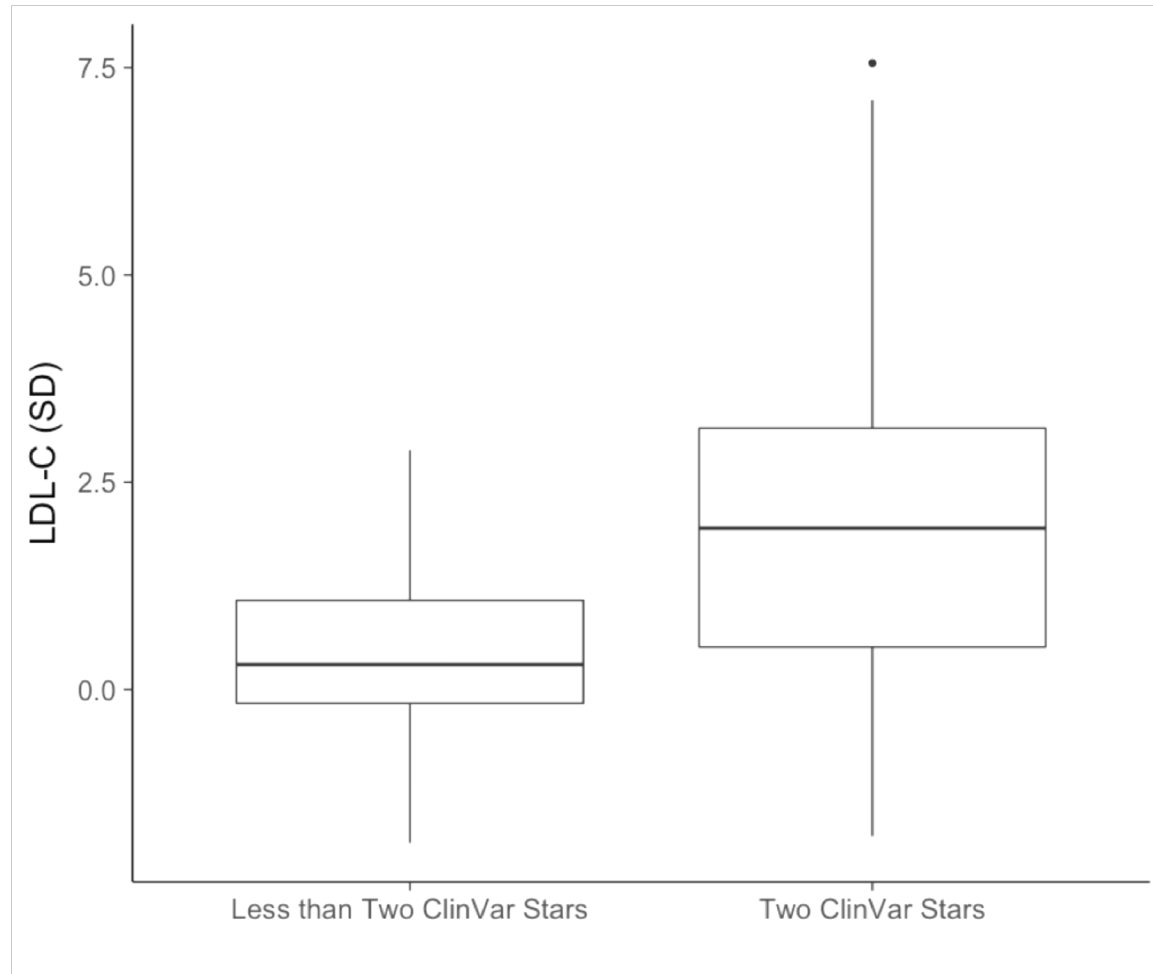

Supplementary Figure 5: Boxplot displaying the interquartile range of LDL-C in patient participants with P/LP *LDLR* missense variants with less than two stars (n=44) or two stars (n=90) in ClinVar. LDL-C was 1.66 SD (95% CI: 1.02, 2.31;  $p = 1.24 \times 10^{-6}$ ) higher in individuals with two-star missense variants compared to individuals with one- or zero- star missense variants.

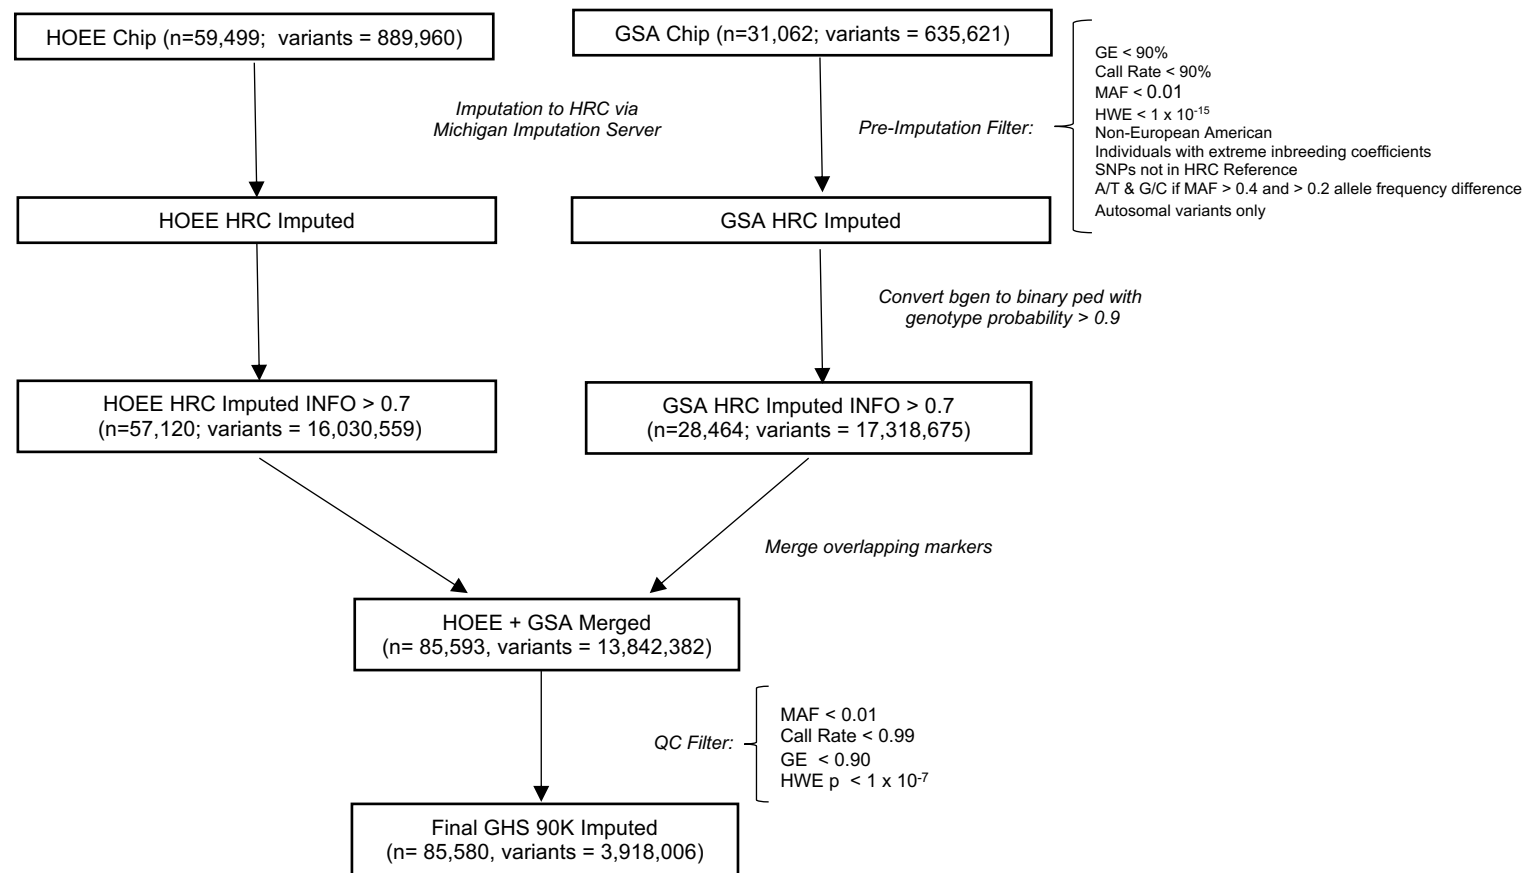

Supplementary Figure 6: Workflow describing imputation, QC, and merging of genotype data used in this study for polygenic scoring. Strict QC was applied to the final dataset to remove technical artifacts that may arise from merging the GSA and HOEE genotype platforms.

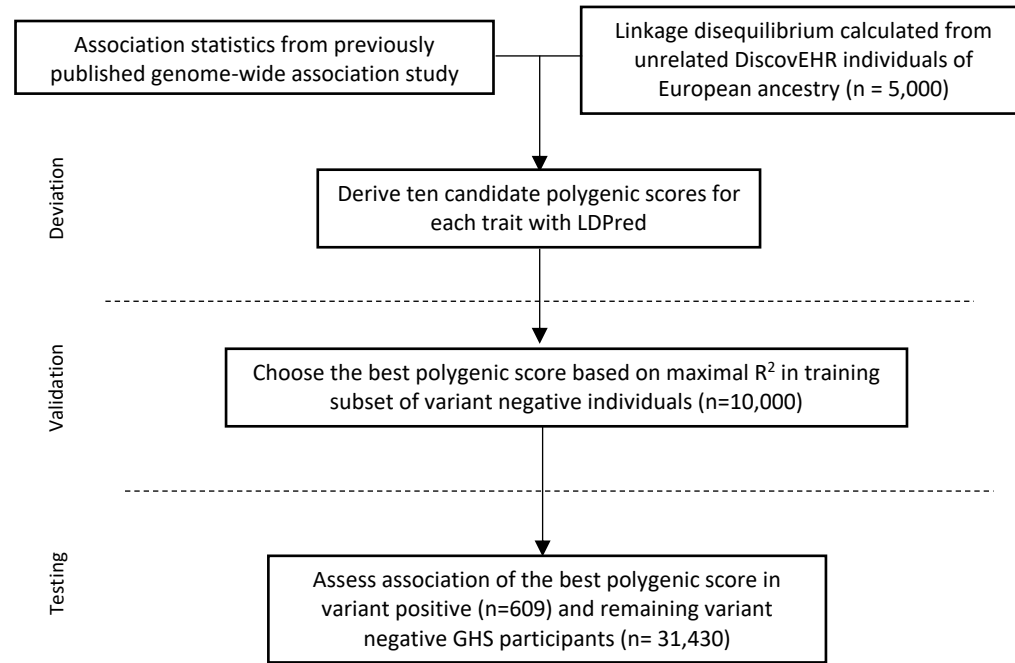

Supplementary Figure 7: Polygenic score workflow presented with the same design as Khera et al. (2018)<sup>1</sup>.

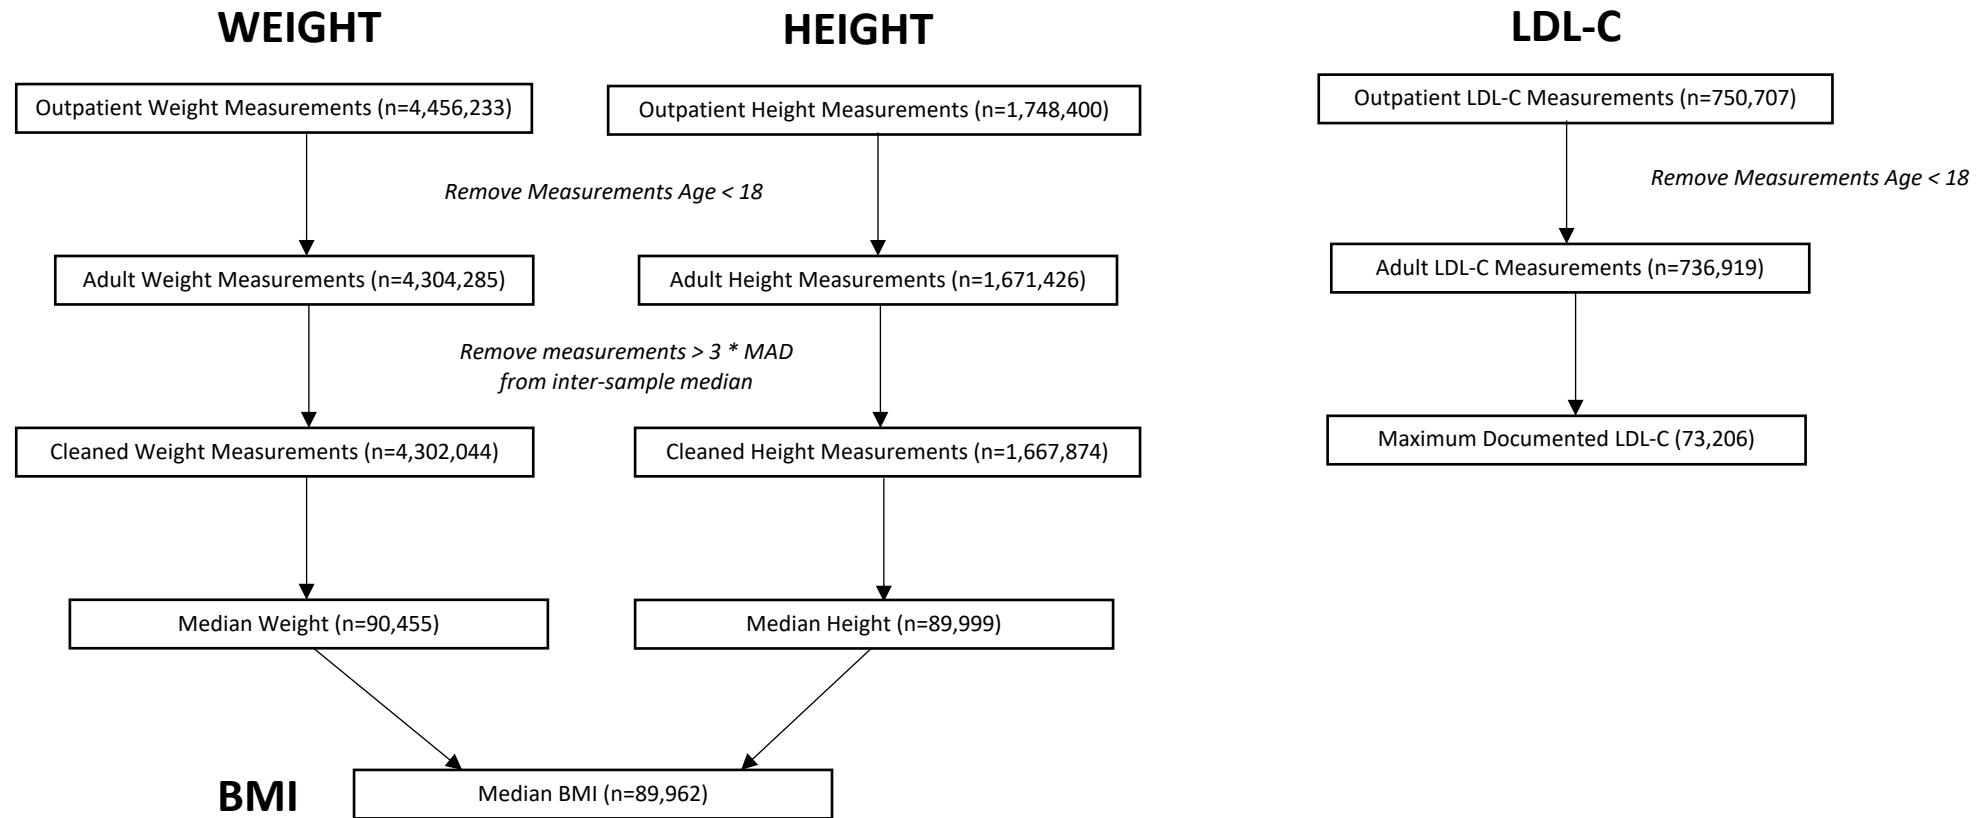

Supplementary Figure 8: Quality control and development of quantitative phenotypes derived from outpatient measurements. Height was recorded to the nearest inch, weight to the nearest pound, and LDL-C to the nearest mg/dL. Height and weight were converted to metric units. All phenotype values were residualized for Age, PC1-6, and genotype batch separately by sex in all available unrelated samples of European descent.



| LDPred ( $\rho$ ) | Variance Explained ( $R^2$ ) |                |                |
|-------------------|------------------------------|----------------|----------------|
|                   | Height                       | BMI            | LDL-C          |
| Infinite          | <b>(0.217)</b>               | 0.106          | 0.023          |
| 1                 | 0.195                        | <b>(0.109)</b> | 0.024          |
| 0.3               | 0.193                        | 0.101          | 0.036          |
| 0.1               | 0.162                        | 0.069          | 0.561          |
| 0.03              | 0.142                        | 0.042          | <b>(0.079)</b> |
| 0.01              | 0.087                        | 0.029          | 0.024          |
| 0.003             | 0.070                        | 0.019          | 0.015          |
| 0.001             | 0.039                        | 0.005          | 0.017          |
| 0.0003            | 0.058                        | 0.002          | 0.022          |
| 0.0001            | 0.049                        | 0.003          | 0.029          |

Supplementary Table 1: Performance of LDPred polygenic scores in the validation cohort (n=10,000) at different increments of  $\rho$ , a prior to the LDPred model that accounts for the proportion of variants assumed to be causal. The maximal performing  $\rho$  for each phenotype is indicated with bold text and parentheses.

Supplementary Table 2: Test for equality between an extreme polygenic score (100<sup>th</sup> percentile) and RGD-causing variants

| Trait  | RGD                                   | Extreme PGS                            | RGD Beta-Estimate*<br>(95% CI) | P-Value<br>(Uncorrected) | P-Value<br>(Corrected)  | RGD<br>Sample Size | Extreme PGS<br>Sample Size |
|--------|---------------------------------------|----------------------------------------|--------------------------------|--------------------------|-------------------------|--------------------|----------------------------|
| Height | 47,XXX                                | 100 <sup>th</sup> Percentile (Females) | -0.36 (-0.70, -0.02)           | 0.05                     | 0.20                    | 42                 | 164                        |
|        | 47,XXY                                | 100 <sup>th</sup> Percentile (Males)   | -0.72 (-1.06, -0.38)           | 4.41 x 10 <sup>-5</sup>  | 1.76 x 10 <sup>-4</sup> | 44                 | 151                        |
|        | 47,YY                                 | 100 <sup>th</sup> Percentile (Males)   | 0.04 (-0.39, 0.48)             | 0.84                     | 1                       | 24                 | 151                        |
|        | 45,X                                  | 1st Percentile (Females)               | -0.81 (-1.24, -0.37)           | 3.46 x 10 <sup>-4</sup>  | 1.38 x 10 <sup>-3</sup> | 19                 | 176                        |
| BMI    | Melanocortin 4 Receptor<br>Deficiency | 100 <sup>th</sup> Percentile           | -0.32 (-0.67, 0.02)            | 0.06                     | 0.18                    | 58                 | 315                        |
|        | 16p11.2 Deletion                      | 100 <sup>th</sup> Percentile           | 0.38 (-0.02, 0.77)             | 0.06                     | 0.18                    | 44                 | 315                        |
|        | 16p11.2 Duplication                   | 1 <sup>st</sup> Percentile             | 0.23 (0.03, 0.43)              | 0.02                     | 0.06                    | 50                 | 316                        |
| LDL-C  | <i>LDLR</i> FH                        | 100 <sup>th</sup> Percentile           | 1.84 (1.53, 2.14)              | 1.60 x 10 <sup>-28</sup> | 6.4 x 10 <sup>-28</sup> | 146                | 315                        |
|        | <i>APOB</i> FH                        | 100 <sup>th</sup> Percentile           | 0.76 (0.48, 1.04)              | 1.59 x 10 <sup>-7</sup>  | 6.36 x 10 <sup>-7</sup> | 87                 | 315                        |
|        | <i>PCSK9</i> FHBL                     | 1 <sup>st</sup> Percentile             | 0.06 (-0.19, 0.32)             | 0.61                     | 1                       | 42                 | 315                        |
|        | <i>APOB</i> FHBL                      | 1 <sup>st</sup> Percentile             | -0.81 (-1.06, -0.56)           | 5.15 x 10 <sup>-10</sup> | 2.06 x 10 <sup>-9</sup> | 53                 | 315                        |

\*A negative RGD beta-estimate indicates the effect size of the RGD is less than an extreme polygenic score

RGD: Rare Genetic Disorder

CI: Confidence Interval

FH: Familial Hypercholesterolemia

FHBL: Familial Hypobetalipoproteinemia

Supplementary Table 3: Spearman's Non-parametric test of the correlation between polygenic scores and quantitative phenotypes.

| Trait  | RGD                                | Spearman Rho | P-Value                |
|--------|------------------------------------|--------------|------------------------|
| Height | Variant Negative                   | 0.45         | $< 1 \times 10^{-300}$ |
|        | 47,XXX                             | 0.51         | $7.32 \times 10^{-4}$  |
|        | 47,XXY                             | 0.33         | $2.78 \times 10^{-2}$  |
|        | 47, XYY                            | 0.18         | $3.91 \times 10^{-1}$  |
|        | 45,X                               | 0.45         | $5.32 \times 10^{-2}$  |
| BMI    | Variant Negative                   | 0.33         | $< 1 \times 10^{-300}$ |
|        | Melanocortin 4 Receptor Deficiency | 0.41         | $1.23 \times 10^{-3}$  |
|        | 16p11.2 Deletion                   | 0.16         | $3.12 \times 10^{-1}$  |
|        | 16p11.2 Duplication                | 0.37         | $7.40 \times 10^{-3}$  |
| LDL-C  | Variant Negative                   | 0.28         | $< 1 \times 10^{-300}$ |
|        | <i>LDLR</i> FH                     | 0.19         | $2.16 \times 10^{-2}$  |
|        | <i>APOB</i> FH                     | 0.15         | $1.60 \times 10^{-1}$  |
|        | <i>APOB</i> FHLB                   | 0.40         | $3.18 \times 10^{-3}$  |
|        | <i>PCSK9</i> FHLB                  | 0.45         | $3.04 \times 10^{-3}$  |

RGD: Rare Genetic Disorder  
 FH: Familial Hypercholesterolemia  
 FHLB: Familial Hypobetalipoproteinemia

Supplementary Table 4: Effect sizes of rare pathogenic variants adjusted for polygenic scores

| Trait  | RGD                                   | RGD Beta<br>(95% CI) | RGD<br>P-Value            | RGDAdjPGS<br>Beta (95% CI) | RGDAdjPGS<br>P-Value      |
|--------|---------------------------------------|----------------------|---------------------------|----------------------------|---------------------------|
| Height | 47,XXX                                | 0.93 (0.64, 1.23)    | 1.46 x 10 <sup>-9</sup>   | 0.97 (0.70, 1.23)          | 1.56 x 10 <sup>-12</sup>  |
|        | 47,XXY                                | 0.56 (0.26, 0.85)    | 2.22 x 10 <sup>-4</sup>   | 0.55 (0.28, 0.81)          | 3.62 x 10 <sup>-5</sup>   |
|        | 47,XYY                                | 1.32 (0.92, 1.72)    | 8.67 x 10 <sup>-11</sup>  | 1.27 (0.91, 1.62)          | 2.32 x 10 <sup>-12</sup>  |
|        | 45,X                                  | -1.91 (-2.37, -1.47) | 6.52 x 10 <sup>-17</sup>  | -1.91 (-2.31, -1.52)       | 4.58 x 10 <sup>-21</sup>  |
| BMI    | Melanocortin 4 Receptor<br>Deficiency | 0.64 (0.39, 0.90)    | 9.03 x 10 <sup>-7</sup>   | 0.59 (0.36, 0.84)          | 1.32 x 10 <sup>-6</sup>   |
|        | 16p11.2 Deletion                      | 1.34 (1.05, 1.64)    | 4.80 x 10 <sup>-19</sup>  | 1.38 (1.10, 1.65)          | 1.14 x 10 <sup>-22</sup>  |
|        | 16p11.2 Duplication                   | -0.52 (-0.80, -0.25) | 2.09 x 10 <sup>-4</sup>   | -0.63 (-0.89, -0.37)       | 2.48 x 10 <sup>-6</sup>   |
| LDL-C  | <i>LDLR</i> FH                        | 2.49 (2.33, 2.65)    | 1.15 x 10 <sup>-208</sup> | 2.47 (2.32, 2.63)          | 3.16 x 10 <sup>-218</sup> |
|        | <i>APOB</i> FH                        | 1.42 (1.21, 1.62)    | 7.39 x 10 <sup>-42</sup>  | 1.38 (1.18, 1.57)          | 2.57 x 10 <sup>-43</sup>  |
|        | <i>PCSK9</i> FHBL                     | -0.72 (-1.01, -0.43) | 1.55 x 10 <sup>-6</sup>   | -0.78 (-1.06, -0.49)       | 6.41 x 10 <sup>-8</sup>   |
|        | <i>APOB</i> FHBL                      | -1.59 (-1.86, -1.33) | 8.49 x 10 <sup>-33</sup>  | -1.62 (-1.87 -1.37)        | 7.63 x 10 <sup>-37</sup>  |

RGD: Rare Genetic Disorder

RGDAdjPGS: RGD adjusted for Polygenic Score

CI: Confidence Interval

FH: Familial Hypercholesterolemia

FHBL: Familial Hypobetalipoproteinemia

Supplementary Table 5: Mean of standardized quantitative phenotypes across tertiles of the polygenic score by rare genetic disorders.

| <b>RGD</b>                         | <b>Tertile 1</b> | <b>Tertile 2</b> | <b>Tertile 3</b> |
|------------------------------------|------------------|------------------|------------------|
| 47, XXX                            | 0.39 ± 0.26      | 0.91 ± 0.24      | 1.83 ± 0.31      |
| 47, XXY                            | 0.11 ± 0.24      | 0.51 ± 0.21      | 1.05 ± 0.36      |
| 47, XYY                            | 0.68 ± 0.40      | 1.67 ± 0.45      | 1.48 ± 0.35      |
| 45,X                               | -2.65 ± 0.25     | -2.63 ± 0.30     | -0.35 ± 0.68     |
| Melanocortin 4 Receptor Deficiency | -0.02 ± 0.29     | 0.74 ± 0.32      | 1.00 ± 0.18      |
| 16p11.2 Deletion                   | 1.06 ± 0.32      | 1.44 ± 0.35      | 1.56 ± 0.35      |
| 16p11.2 Duplication                | -0.89 ± 0.25     | -0.71 ± 0.14     | -0.18 ± 0.17     |
| <i>LDLR</i> FH                     | 1.88 ± 0.26      | 2.58 ± 0.30      | 2.93 ± 0.35      |
| <i>APOB</i> FH                     | 1.35 ± 0.24      | 1.24 ± 0.25      | 1.59 ± 0.23      |
| <i>APOB</i> FHBL                   | -2.18 ± 0.14     | -1.43 ± 0.27     | -1.26 ± 0.30     |
| <i>PCSK9</i> FHBL                  | -1.22 ± 0.17     | -1.74 ± 0.25     | -0.42 ± 0.17     |

RGD: Rare Genetic Disorder

FH: Familial Hypercholesterolemia

FHBL: Familial Hypobetalipoproteinemia

Standard error of the mean is included after the ± symbol. A value of 0 indicates the phenotype is approximately equal to the mean of the variant negative population.

Supplementary Table 6: Tests for equality of PGS beta-estimates in RGD+ and RGD- individuals

| Trait  | Rare Genetic Disorder              | Test Statistic | P-Value (Uncorrected) | P-Value (Corrected) |
|--------|------------------------------------|----------------|-----------------------|---------------------|
| Height | 47,XXX                             | -0.40          | 0.69                  | 1                   |
|        | 47,XXY                             | -0.05          | 0.96                  | 1                   |
|        | 47,XYY                             | 0.78           | 0.43                  | 1                   |
|        | 45,X                               | -1.40          | 0.16                  | 0.65                |
| BMI    | Melanocortin 4 Receptor Deficiency | -1.37          | 0.17                  | 0.68                |
|        | 16p11.2 BP4-5 Deletion             | -0.16          | 0.87                  | 1                   |
|        | 16p11.2 BP4-5 Duplication          | 0.14           | 0.89                  | 1                   |
| LDL-C  | <i>LDLR</i> FH                     | -1.25          | 0.21                  | 0.84                |
|        | <i>APOB</i> FH                     | 0.81           | 0.42                  | 1                   |
|        | <i>APOB</i> FHBL                   | -0.16          | 0.88                  | 1                   |
|        | <i>PCSK9</i> FHBL                  | -0.63          | 0.53                  | 1                   |

RGD: Rare Genetic Disorder

CI: Confidence Interval

FH: Familial Hypercholesterolemia

FHBL: Familial Hypobetalipoproteinemia

Supplementary Table 7: Median LogR thresholds for calling sex chromosomal aneuploidy in DiscovEHR on the HOEE and GSA platforms

| <b>Aneuploidy</b>   | <b>GSA mLRR Threshold</b> | <b>HOEE mLRR Threshold</b> | <b>EHR-Documented Sex</b> |
|---------------------|---------------------------|----------------------------|---------------------------|
| 47,XXX              | > 0.09                    | > 0.15                     | Female                    |
| 47,XXY              | > 0.1                     | > -0.01                    | Male                      |
| 47,XYY              | > 0.10                    | > -0.2                     | Male                      |
| 45,X and 45,X/46,XX | < -0.28                   | < -0.20                    | Female                    |

GSA - Global Screening Array  
 HOEE - Human Omni Exome Express  
 mLRR - Median Log R Ratio

Supplementary Table 8: Prevalence of rare genetic disorders in DiscovEHR.

| Rare Genetic Disorder              | Samples Identified | Variant Negative | Prevalence in DiscovEHR (%) | Included in Study | Sample Inclusion Criteria for Prevalence          |
|------------------------------------|--------------------|------------------|-----------------------------|-------------------|---------------------------------------------------|
| 47,XXX                             | 46                 | 48,427           | 0.095                       | 42                | EHR-Documented Females Passing Array Intensity QC |
| 47,XXY                             | 47                 | 31,834           | 0.148                       | 44                | EHR-Documented Males Passing Array Intensity QC   |
| 47,XYY                             | 27                 | 31,834           | 0.085                       | 24                | EHR-Documented Males Passing Array Intensity QC   |
| 45,X                               | 21                 | 48,427           | 0.043                       | 19                | EHR-Documented Females Passing Array Intensity QC |
| Melanocortin 4 Receptor Deficiency | 81                 | 92,455           | 0.088                       | 58                | Passing WES QC                                    |
| 16p11.2 BP4-5 Deletion             | 58                 | 90,620           | 0.064                       | 44                | Passing CLAMMS QC                                 |
| 16p11.2 BP4-5 Duplication          | 63                 | 90,620           | 0.070                       | 50                | Passing CLAMMS QC                                 |
| <i>LDLR</i> FH                     | 233                | 92,455           | 0.252                       | 146               | Passing WES QC                                    |
| <i>APOB</i> FH                     | 127                | 92,455           | 0.137                       | 87                | Passing WES QC                                    |
| <i>PCSK9</i> FHBL                  | 83                 | 92,455           | 0.090                       | 42                | Passing WES QC                                    |
| <i>APOB</i> FHBL                   | 85                 | 92,455           | 0.092                       | 53                | Passing WES QC                                    |



## **Supplementary Note 1: Comparisons of Variance Explained by PGSs in DiscovEHR with Other Cohorts**

In the testing cohort, the variance explained by the PGS<sub>HEIGHT</sub> (21.2%) and PGS<sub>BMI</sub> (11.5%) were similar to those reported in the combined GWAS meta-analysis publication that produced the summary statistics. In the Health and Retirement Study (HRS) using associated SNPs ( $p < 0.001$ ) the variance explained by the PGS<sub>HEIGHT</sub> and PGS<sub>BMI</sub> scores were reported to be ~24.4% and ~8.6%, respectively. While we observe an improvement in the PGS<sub>BMI</sub>, we note that height in the DiscovEHR data is measured and recorded to the nearest inch, which may reduce the variance explained by the PGS<sub>HEIGHT</sub> relative to cohorts that record heights to the nearest centimeter (UK Biobank) or quarter-inch (HRS).

Our PGS<sub>LDL-C</sub> score is more predictive than a recent PGS analysis in the Million Veteran Program (MVP),<sup>1</sup> which constructed a PGS of genome-wide significant SNPs ( $n=223$ ) from summary statistics of an exome-array based association study<sup>2,3</sup>. This study reported that the variance explained was 4.1% when using maximum documented LDL-C as the phenotype. On the other hand, an analysis of a PGS<sub>LDL-C</sub> by the NIH/NHLBI Trans-Omics for Precision Medicine (TOPMed) research program on 16,324 individuals with whole-genome sequence (WGS) data reported the effect size of a high PGS<sub>LDL-C</sub> (top 5% of distribution) to be approximately 33.07 mg/dL in European Americans. Relative to the TOPMed analysis, we report a smaller effect size of a high PGS<sub>LDL-C</sub> using the same percentile at 23.57 mg/dL.

## **Supplementary Note 2: Non-Parametric Analysis of PGS and Variable Expressivity**

The non-parametric Spearman's rank-order correlation yielded similar results as compared with linear regression, with the exceptions of 45,X and 47,XXY, which trended toward and met nominal significance, respectively. The Spearman's correlation coefficients ( $\rho$ ) of the PGS and

trait-expression in these two RGDs were similar to that of the general population (Supplemental Table 3).

### **Supplementary Note 3: Members of the Geisinger-Regeneron DiscovEHR Collaboration**

#### Regeneron Genetics Center

Goncalo Abecasis, Ph.D., Aris Baras, M.D., Michael Cantor, M.D., Giovanni Coppola, M.D., Aris Economides, Ph.D., Luca Lotta, M.D., Ph.D., John D. Overton, Ph.D., Jeffrey G. Reid, Ph.D., Alan Shuldiner, M.D, Christina Beechert, Caitlin Forsythe, M.S., Erin D. Fuller, Zhenhua Gu, M.S., Michael Lattari, Alexander Lopez, M.S., John D. Overton, Ph.D., Thomas D. Schleicher, M.S., Maria Sotiropoulos Padilla, M.S., Karina Toledo, Louis Widom, Sarah E. Wolf, M.S., Manasi Pradhan, M.S., Kia Manoochehri, Ricardo H. Ulloa, Xiaodong Bai, Ph.D., Suganthi Balasubramanian, Ph.D., Leland Barnard, Ph.D., Andrew Blumenfeld, Gisu Eom, Lukas Habegger, Ph.D., Young Hahn, Alicia Hawes, B.S., Shareef Khalid, Jeffrey G. Reid, Ph.D., Evan K. Maxwell, Ph.D., William Salerno, Ph.D., Jeffrey C. Staples, Ph.D., Ashish Yadav, M.S., Marcus B. Jones, Ph.D., and Lyndon J. Mitnaul, Ph.D.

#### Geisinger

W. Andrew Faucett, Christopher Still, F. Daniel Davis, David J. Carey, Derek Boris, Dustin N. Hartzel, Joseph B. Leader, Lance J. Adams, H. Lester Kirchner, Matthew T. OetjensMarc Williams, J. Neil Manus, Raghu P. Metpally, Ryan D. Colonie, Sarah A. Pendergrass, Tooraj Mirshahi, Jen Wagner, Huntington F. Willard, Christa L. Martin, and David H, Ledbetter Ph.D., and Thomas Nate Person

## References

1. Khera, A. V. *et al.* Genome-wide polygenic scores for common diseases identify individuals with risk equivalent to monogenic mutations. *Nat. Genet.* 1 (2018).
2. Klarin, D. *et al.* Genetics of blood lipids among ~300,000 multi-ethnic participants of the Million Veteran Program. *Nat. Genet.* **50**, 1514–1523 (2018).
3. Liu, D. J. *et al.* Exome-wide association study of plasma lipids in >300,000 individuals. *Nat. Genet.* **49**, 1758–1766 (2017).
