# Supplementary material for: Quantifying the polygenic contribution to variable expressivity in eleven rare genetic disorders
Source: PubMed Central journal article supplement (PMC6814771; doi:10.1038/s41467-019-12869-0), 2019-10-25
Supplement: 41467_2019_12869_MOESM5_ESM.pdf [file 41467_2019_12869_MOESM5_ESM.pdf]

**Title:** Supplemental Data 1

**Description:** List of RGD-causing SNV and indels included in this study
